# Supplementary material for: Risk Factors for Gastric Cancer after the Eradication of Helicobacter pylori Evaluated Based on the Background Gastric Mucosa: A Propensity Score-matched Case-control Study
Source: PubMed Central journal article supplement — Intern Med. 2020 Nov 9;60(7):969–76. doi: 10.2169/internalmedicine.5486-20 (PMC8079910; doi:10.2169/internalmedicine.5486-20), 2020-11-09
Supplement: 1349-7235-60-0969-s001.pdf [file 1349-7235-60-0969-s001.pdf]

Supplementary table 1

Histological examination of Fig.2 case that was evaluated by the updated Sydney System

|                                 | <i>H. pylori</i> | Activity | Inflammation | Atrophy  | IM       |
|---------------------------------|------------------|----------|--------------|----------|----------|
| Greater curvature of the antrum | <b>0</b>         | <b>0</b> | <b>1</b>     | <b>0</b> | <b>1</b> |
| Lesser curvature of the corpus  | <b>0</b>         | <b>0</b> | <b>2</b>     | <b>2</b> | <b>3</b> |
| Greater curvature of the corpus | <b>0</b>         | <b>0</b> | <b>1</b>     | <b>1</b> | <b>0</b> |

IM: Intestinal metaplasia
